# Supplementary material
Source: publisher site journal article supplement (https://www.spandidos-publications.com/1476/downloadSupplementary)
Supplement: Supplementary file 1 [file downloadSupplementary]

## Sheet: Compound List
Table SI. Library of 78 natural compounds.
Index	ID	MOLENAME	CAS	Weight, mg	SMILES	Formula	MolWt	Source	Category	Description
1	T4907	3,4-Dihydroxyphenylacetic acid	102-32-9	3 μl, 10 mMol/l	OC(=O)Cc1ccc(c(c1)O)O	C8H8O4	168.14	Plant	Phenols	3,4-Dihydroxybenzeneacetic acid is the main neuronal metabolite of dopamine.
2	T3054	Daurisoline	70553-76-3	3 μl, 10 mMol/l	CN1CCc2cc(c(cc2[C@H]1Cc1ccc(cc1)Oc1c(ccc(c1)C[C@@H]1c2cc(c(cc2CCN1C)OC)O)O)OC)OC	C37H42N2O6	610.75	Plant	Alkaloids	Daurisoline is a kind of alkaloid extracted from the kudzu root of menispermaceae plants.
3	T0014	cis-Anethol	104-46-1	3 μl, 10 mMol/l	COc1ccc(\C=C\C)cc1	C10H12O	148.2	Plant	Others	Anethole is a type of aromatic compound that exists widely in nature, widely utilized as a seasoning substance.
4	T0329	Thiodiglycol	111-48-8	3 μl, 10 mMol/l	OCCSCCO	C4H10O2S	122.19	Organism	Others	Thiodiglycol has both polar and nonpolar solvent properties. It is used as a solvent in a variety of applications ranging from dyeing textiles to inks in some ballpoint pens
5	T2723	Ketoisophorone	1125-21-9	3 μl, 10 mMol/l	CC1=CC(=O)CC(C)(C)C1=O	C9H12O2	152.19	Plant	Quinones	Ketoisophorone is the major ingredients of saffron spice. It is a cyclic olefin and was reported as a product of the thermal degradation of β-carotene in aqueous suspension.
6	T0399	Methyl salicylate	119-36-8	3 μl, 10 mMol/l	COC(=O)c1ccccc1O	C8H8O3	152.15	Plant	Phenols	Methyl salicylate (oil of wintergreen or wintergreen oil) is an organic ester naturally produced by many species of plants, particularly wintergreens. For acute joint and muscular pain, methyl salicylate is used as a rubefacient and analgesic in deep heating liniments.
7	T0729	Benzyl benzoate	120-51-4	3 μl, 10 mMol/l	O=C(OCc1ccccc1)c1ccccc1	C14H12O2	212.24	Plant	Others	Benzyl benzoate is one of the older preparations used for the therapy of scabies. Scabies is a skin infection caused by the Sarcoptes scabiei. Its symptoms are red spots, severe itching (particularly at night), and may lead to a secondary infection. Benzyl benzoate is useful in the therapy of scabies because it is lethal to this mite. It is also used for the therapy of lice affection of the body …
8	T0685	Retinyl acetate	127-47-9	3 μl, 10 mMol/l	CC(=O)OC/C=C(\C)/C=C/C=C(\C)/C=C/C1=C(C)CCCC1(C)C	C22H32O2	328.5	Plant	Others	Vitamin A is a group of unsaturated nutritional hydrocarbons, that contains retinal, retinol, retinoic acid, and several provitamins A carotenoids, among which beta-carotene is the most important.
9	T0978	D-Pantethine	16816-67-4	3 μl, 10 mMol/l	OCC(C)(C)[C@H](C(=O)NCCC(=O)NCCSSCCNC(=O)CCNC(=O)[C@@H](C(CO)(C)C)O)O	C22H42N4O8S2	554.72	Organism	Others	Pantethine (Bis-pantethine) or "Co-enzyme pantethine" is a dimeric form of vitamin B5, composed of two molecules of pantothenic acid linked by cysteamine bridging groups. The monomer of this compound is known as pantetheine and is an intermediate in the production of Coenzyme A by the body. Pantethine is considered the more biologically active form of vitamin B5, but is less stable than pantothen…
10	T2783	Methyl Dihydrojasmonate	24851-98-7	3 μl, 10 mMol/l	CCCCC[C@@H]1[C@@H](CC(=O)OC)CCC1=O	C13H22O3	226.32	Plant	Others	Methyl dihydrojasmonate is an ester and a diffusive aroma compound, with the smell vaguely similar to jasmine. In racemic mixtures the odor is floral and citrus while epimerized mixtures exhibit a dense fatty floral odor with odor recognition thresholds of 15 parts per billion.
11	T0762	Trans-Anethole	4180-23-8	3 μl, 10 mMol/l	COc1ccc(/C=C/C)cc1	C10H12O	148.2	Plant	Others	Anethole (anise camphor), an organic compound, is widely served as a condiment substance. It is a derivative of phenylpropene, a type of aromatic compound that exists widely in essential oils.
12	T1202	(-)-Cotinine	486-56-6	3 μl, 10 mMol/l	[C@H]1(c2cccnc2)N(C(=O)CC1)C	C10H12N2O	176.22	Organism	Others	Cotinine is an alkaloid found in tobacco and is also the predominant metabolite of nicotine.
13	T2893	Muscone	541-91-3	3 μl, 10 mMol/l	C1C(CCCCCCCCCCCCC1=O)C	C16H30O	238.41	Plant	ketone	Muscone is an organic compound that is the primary contributor to the odor of musk.
14	T1016	Vitamin E Acetate	58-95-7	3 μl, 10 mMol/l	c12c(c(c(c(c2C)C)OC(=O)C)C)CC[C@](O1)(CCC[C@@H](CCC[C@@H](CCCC(C)C)C)C)C	C31H52O3	472.76	Plant; Animal	Phenols	A natural tocopherol and one of the most potent antioxidant tocopherols. It exhibits antioxidant activity by virtue of the phenolic hydrogen on the 2 h-1-benzopyran-6-ol nucleus. It has four methyl groups on the 6-chromanol nucleus. The natural d form of alpha-tocopherol is more active than its synthetic dl-alpha-tocopherol racemic mixture.
15	T1648	Vitamin E	59-02-9	3 μl, 10 mMol/l	c12c(c(c(c(c1C)C)O)C)CC[C@](O2)(CCC[C@@H](CCC[C@@H](CCCC(C)C)C)C)C	C29H50O2	430.71	Plant; Animal	Phenols	(+)-α-Tocopherol is a naturally-occurring form of vitamin E, a fat-soluble vitamin with potent antioxidant properties.
16	T1221	Acetylcholine chloride	60-31-1	3 μl, 10 mMol/l	[Cl-].CC(=O)OCC[N+](C)(C)C	C7H16ClNO2	181.66	Animal	Alkaloids	Acetylcholine Chloride is the chloride salt form of acetylcholine, a synthetic, quaternary amino alcohol with cholinergic properties. Acetylcholine chloride mimics the parasympathomimetic effect of the endogenous compound acetylcholine. Administered as an ophthalmic solution, this drug stimulates the cholinoceptors in the sphincter muscle of the iris, causing the pupil to constrict.
17	T1082	Benzyl isothiocyanate	622-78-6	3 μl, 10 mMol/l	S=C=NCc1ccccc1	C8H7NS	149.22	Plant	Others	Benzyl isothiocyanate is found in brassicas. Benzyl isothiocyanate is isolated from Tropaeolum majus (garden nasturtium) and Lepidium sativum (garden cress), also in other plants especially in the Cruciferae. Potential nutriceutical.
18	T2935	Phenethylamine	64-04-0	3 μl, 10 mMol/l	NCCc1ccccc1	C8H11N	121.18	Animal	Alkaloids	Phenylethylamine functions as a monoaminergic neuromodulator and, to a lesser extent, a neurotransmitter in the human central nervous system.
19	T1437	Dexpanthenol	81-13-0	3 μl, 10 mMol/l	[C@H](C(=O)NCCCO)(C(CO)(C)C)O	C9H19NO4	205.25	Animal	Others	Dexpanthenol is an alcoholic analogue of D-pantothenic acid and cholinergic agent. Dexpanthenol acts as a precursor of coenzyme A necessary for acetylation reactions and is involved in the synthesis of acetylcholine. Although the exact mechanism of the actions of dexpanthenol is unclear, it may enhance the effect of acetylcholine. Dexpanthenol acts on the gastrointestinal tract and increases lowe…
20	T2971	Phytic acid	83-86-3	3 μl, 10 mMol/l	C1(C(C(C(C(C1OP(=O)(O)O)OP(=O)(O)O)OP(=O)(O)O)OP(=O)(O)O)OP(=O)(O)O)OP(=O)(O)O	C6H18O24P6	660.04	Plant	Miscellaneous	Fytic acid is a complexing agent for removal of traces of heavy metal ions. It acts also as a hypocalcemic agent.
21	T1075	Vitamin K1	84-80-0	3 μl, 10 mMol/l	C1(=O)C(=C(C(=O)c2c1cccc2)C)C/C=C(/CCC[C@@H](CCC[C@@H](CCCC(C)C)C)C)\C	C31H46O2	450.71	Plant; Animal	Quinones	Vitamin K1 a fat-soluble, naturally occurring vitamin with antihemorrhagic and prothrombogenic activity.
22	T1301	Guaiacol	90-05-1	3 μl, 10 mMol/l	COc1ccccc1O	C7H8O2	124.14	Plant	Phenols	Guaiacol is a precursor to various flavorants, such as eugenol and vanillin. Its derivatives are used medicinally as an expectorant, antiseptic, and local anesthetic. It also can be used as an indicator in chemical reactions that produce oxygen. When oxygen binds to it, the complex turns yellowish brown and absorbs light maximally at about 470 nm.
23	T1297	Eugenol	97-53-0	3 μl, 10 mMol/l	COc1c(O)ccc(CC=C)c1	C10H12O2	164.2	Plant	Phenols	Eugenol is a Standardized Chemical Allergen. The physiologic effect of eugenol is by means of Increased Histamine Release and Cell-mediated Immunity.
24	T0437	Inosine	58-63-9	3 μl, 10 mMol/l	OC[C@@H]1[C@H]([C@H]([C@H](n2cnc3c2nc[nH]c3=O)O1)O)O	C10H12N4O5	268.23	Animal	Alkaloids	Inosine is a purine nucleoside that has hypoxanthine linked by the N9 nitrogen to the C1 carbon of ribose. It is an intermediate in the degradation of purines and purine nucleosides to uric acid and in pathways of purine salvage.
25	T0408	Dehydrocholic acid	81-23-2	3 μl, 10 mMol/l	C1(=O)CC[C@]2([C@@H](C1)CC(=O)[C@H]1[C@@H]3CC[C@H]([C@@H](CCC(=O)O)C)[C@@]3(C)C(=O)C[C@H]21)C	C24H34O5	402.52	Animal	Others	Dehydrocholic acid is a synthetic bile acid, produced by the oxidation of cholic acid.
26	T0759	Monobenzone	103-16-2	3 μl, 10 mMol/l	Oc1ccc(OCc2ccccc2)cc1	C13H12O2	200.23	Plant	Others	Monobenzone is a Depigmenting Agent. The mechanism of action of monobenzone is as a Melanin Synthesis Inhibitor. The physiologic effect of monobenzone is by means of Depigmenting Activity.
27	T0449	Menadione	58-27-5	3 μl, 10 mMol/l	CC1=CC(=O)c2ccccc2C1=O	C11H8O2	172.18	Organism	Quinones	Menadione is a synthetic naphthoquinone without the isoprenoid side chain and biological activity, but can be converted to active vitamin K2, menaquinone, after alkylation in vivo.
28	T0439	L-Tryptophan	73-22-3	3 μl, 10 mMol/l	C(=O)([C@@H](N)Cc1c[nH]c2ccccc12)O	C11H12N2O2	204.23	Organism	Others	L-Tryptophan, an essential amino acid, is necessary for normal growth in infants and for nitrogen balance in adults. It is a precursor of SEROTONIN (hence its use as an antidepressant and sleep aid) and of INDOLE ALKALOIDS in plants. It can be a precursor to NIACIN, although inefficiently in mammals.
29	T0429	Glucosamine	3416-24-8	3 μl, 10 mMol/l	C(=O)[C@H](N)[C@@H](O)[C@H](O)[C@H](O)CO	C6H13NO5	179.17	Animal	saccharides	Glucosamine is an amino sugar and a prominent precursor in the biochemical synthesis of glycosylated proteins and lipids. Supplemental glucosamine may help to rebuild cartilage and treat arthritis.
30	T0375L	Atropine sulfate monohydrate	5908-99-6	3 μl, 10 mMol/l	O.OS(=O)(=O)O.O=C(C(c1ccccc1)CO)O[C@H]1C[C@H]2CC[C@H](N2C)C1.O=C(C(c1ccccc1)CO)O[C@H]1C[C@H]2CC[C@H](N2C)C1	C34H46N2O6·H2SO4·H2O	694.83	Plant	Esters	Atropine sulfate monohydrate, the sulfate salt of atropine, is a competitive muscarinic acetylcholine receptor antagonist.
31	T0421	Inositol	87-89-8	3 μl, 10 mMol/l	O[C@H]1[C@@H](O)[C@@H](O)[C@H](O)[C@@H](O)[C@@H]1O	C6H12O6	180.16	Organism	Alcohol	Inositol is a intracellular phosphate compound, involved in cell signaling and may stimulate tumor cell differentiation.
32	T0461	Berberine hydrochloride	633-65-8	3 μl, 10 mMol/l	[Cl-].COc1c(OC)c2c[n+]3c(cc2cc1)c1cc2c(OCO2)cc1CC3	C20H18ClNO4	371.8	Plant	Alkaloids	Berberine hydrochloride is an alkaloid from Hydrastis canadensis L., Berberidaceae and also found in many other plants. It is relatively toxic to parenterally but has been used orally for various fungal and parasitic infections and an anti-diarrheal.
33	T0443	Salicoside	138-52-3	3 μl, 10 mMol/l	OC[C@H]1O[C@@H](Oc2ccccc2CO)[C@H](O)[C@@H](O)[C@@H]1O	C13H18O7	286.28	Plant	Glycosides	Salicin, a phenol β-glycoside produced from willow bark, shows anti-inflammatory functions.
34	T0433	Artesunate	88495-63-0	3 μl, 10 mMol/l	O1O[C@]2(O[C@H]3O[C@@H](OC(=O)CCC(=O)O)[C@@H]([C@H]4[C@@]13[C@H]([C@@H](CC4)C)CC2)C)C	C19H28O8	384.42	Plant	Terpenoids	Artesunate is part of the artemisinin group of drugs that treat malaria. It is a semi-synthetic derivative of artemisinin that is water-soluble and may therefore be given by injection. It is on the World Health Organization's List of Essential Medicines.
35	T0414	D-Mannitol	69-65-8	3 μl, 10 mMol/l	OC[C@@H](O)[C@@H](O)[C@H](O)[C@H](O)CO	C6H14O6	182.17	Plant	Miscellaneous	Mannitol is a diuretic and renal diagnostic aid related to sorbitol. It has little significant energy value as it is largely eliminated from the body before any metabolism can take place. It can be used to treat oliguria associated with kidney failure or other manifestations of inadequate renal function and has been used for determination of glomerular filtration rate. Mannitol is also commonly u…
36	T0465	Ellagic acid	476-66-4	3 μl, 10 mMol/l	Oc1c(O)c2c3c(c1)c(=O)oc1c3c(cc(O)c1O)c(=O)o2	C14H6O8	302.19	Plant	Phenols	Ellagic acid is a fused four ring compound isolated from the kino of Eucalyptus maculata Hook and E. Hemipholia F. Muell. Activates Factor XII of the blood clotting system which also causes kinin release; used in research and as a dye.
37	T0375	Atropine	51-55-8	3 μl, 10 mMol/l	O=C(C(c1ccccc1)CO)O[C@H]1C[C@H]2CC[C@H](N2C)C1	C17H23NO3	289.37	Plant	Alkaloids	Atropine Sulfate is the sulfate salt of atropine, a naturally-occurring alkaloid isolated from the plant Atropa belladonna. Atropine functions as a sympathetic, competitive antagonist of muscarinic cholinergic receptors, thereby abolishing the effects of parasympathetic stimulation.
38	T0416	Sodium gluconate	527-07-1	3 μl, 10 mMol/l	[Na+].C(=O)([C@H](O)[C@@H](O)[C@H](O)[C@H](O)CO)[O-]	C6H11NaO7	218.14	Plant;Animal	Others	Sodium Gluconate is the sodium salt of gluconic acid with a chelating property.
39	T0012	Cinchonine	118-10-5	3 μl, 10 mMol/l	O[C@H]([C@H]1C[C@@H]2CCN1C[C@@H]2C=C)c1ccnc2ccccc12	C19H22N2O	294.39	Plant	Alkaloids	Cinchonine, a local anesthetic of the amide type, now generally used for surface anesthesia. It is one of the most potent and toxic of the long-acting local narcotics and its parenteral use is restricted to spinal anesthesia.
40	T0070	Pentoxifylline	6493-05-6	3 μl, 10 mMol/l	Cn1cnc2c1c(=O)n(CCCCC(=O)C)c(=O)n2C	C13H18N4O3	278.31	Plant	Alkaloids	Pentoxifylline modulates immunologic activity by stimulating cytokine production. Pentoxifylline is a methylxanthine derivative that inhibits phosphodiesterase and affects blood rheology. It also inhibits platelet aggregation and improves blood flow by increasing erythrocyte and leukocyte flexibility.
41	T0036	Enoxolone	471-53-4	3 μl, 10 mMol/l	C[C@]12CC[C@](C[C@H]1C1=CC(=O)C3[C@]4(CC[C@@H](C(C4CC[C@]3([C@@]1(CC2)C)C)(C)C)O)C)(C)C(=O)O	C30H46O4	470.68	Plant	Terpenoids	Enoxolone is the major bioactive component of Glycyrrhizae Radix and possesses anti-ulcerative, anti-inflammatory and antiproliferative properties.
42	T0034	Cortisone acetate	50-04-4	3 μl, 10 mMol/l	CC(=O)OCC(=O)[C@]1(CC[C@@H]2[C@@]1(CC(=O)[C@H]1[C@H]2CCC2=CC(=O)CC[C@]12C)C)O	C23H30O6	402.49	Animal	Terpenoids	Cortisone Acetate is the acetate salt form of cortisone, a synthetic or semisynthetic analog of the naturally occurring cortisone hormone produced by the adrenal glands with anti-inflammatory and immunomodulating properties. Cortisone acetate diffuses through the cell membrane and binds to nuclear glucocorticoid receptors. The receptor-ligand complex binds to promotor regions of certain genes and…
43	T0032	DL-Xylose	25990-60-7	3 μl, 10 mMol/l	OC[C@@H](O)[C@H](O)[C@@H](O)C=O	C5H10O5	150.13	Plant	Saccharides	Xylose is a sugar first derived from wood. Xylose is classified as a monosaccharide of the aldopentose type.
44	T0019	Betaine hydrochloride	590-46-5	3 μl, 10 mMol/l	Cl.C[N+](C)(C)CC(=O)O	C5H12ClNO2	153.61	Plant	Alkaloids	Betaine hydrochloride is an acidic form of betaine, a vitamin-like substance observed in grains and other foods; gains the amplification of DNA by decreasing the formation of secondary structure in GC-rich regions.
45	T0022	Taurine	107-35-7	3 μl, 10 mMol/l	NCCS(=O)(=O)O	C2H7NO3S	125.15	Animal	Alkaloids	Taurine, an organic acid, is distributed in various animal tissues.
46	T0060	Streptomycin sulfate	3810-74-0	3 μl, 10 mMol/l	[C@@H]1(O[C@@H]2[C@H]([C@@]([C@H](O2)C)(C=O)O)O[C@@H]2[C@@H]([C@H]([C@@H]([C@H](O2)CO)O)O)NC)[C@H]([C@@H]([C@H]([C@@H]([C@H]1O)O)NC(=N)N)O)NC(=N)N.S(=O)(=O)(O)O.S(=O)(=O)(O)O.[C@@H]1(O[C@@H]2[C@H]([C@@]([C@H](O2)C)(C=O)O)O[C@@H]2[C@@H]([C@H]([C@@H]([C@H](O2)CO)O)O)NC)[C@H]([C@@H]([C@H]([C@@H]([C@H]1O)O)NC(=N)N)O)NC(=N)N.S(=O)(=O)(O)O	2C21H39N7O12·3H2SO4	1457.38	Microorganism	Others	Streptomycin sulfate is a sulfate salt of streptomycin that is a protein synthesis inhibitor.
47	T0069	Uracil	66-22-8	3 μl, 10 mMol/l	O=c1[nH]ccc(=O)[nH]1	C4H4N2O2	112.09	Plant	Alkaloids	Uracil is a common naturally occurring pyrimidine found in RNA, it base pairs with adenine and is replaced by thymine in DNA. Methylation of uracil produces thymine. Uracil's use in the body is to help carry out the synthesis of many enzymes necessary for cell function through bonding with riboses and phosphates. Uracil serves as allosteric regulator and coenzyme for many important biochemical re…
48	T0062	Folic acid	59-30-3	3 μl, 10 mMol/l	O=C(O)[C@H](CCC(=O)O)NC(=O)c1ccc(cc1)NCc1cnc2[nH]c(N)nc(=O)c2n1	C19H19N7O6	441.4	Plant	Alkaloids	Folic acid(Vitamin M; Vitamin B9) is indispensable for the production and maintenance of new cells, for DNA/RNA synthesis.
49	T0063	isoleucine	73-32-5	3 μl, 10 mMol/l	C(=O)([C@@H](N)[C@H](CC)C)O	C6H13NO2	131.17	Plant;Animal	Others	Isoleucine is an essential branched-chain aliphatic amino acid found in many proteins. It is an isomer of LEUCINE. It is important in hemoglobin synthesis and regulation of blood sugar and energy levels.
50	T0064	Adenine	73-24-5	3 μl, 10 mMol/l	Nc1ncnc2c1[nH]cn2	C5H5N5	135.13	Organism	Others	Adenine, a purine derivative, is a nucleobase with various roles in biochemistry including cellular respiration, in the form of both the energy-rich ATP and NAD and FAD, and protein synthesis, as a chemical component of DNA and RNA.
51	T0065	Acetaminophen	103-90-2	3 μl, 10 mMol/l	CC(=O)Nc1ccc(O)cc1	C8H9NO2	151.16	Animal	Phenols	Analgesic antipyretic derivative of acetanilide. Acetaminophen has weak anti-inflammatory properties and is used as a common analgesic, but may cause liver, blood cell, and kidney damage.
52	T0129	Sanguinarine chloride	5578-73-4	3 μl, 10 mMol/l	[Cl-].C[n+]1c2c3cc4c(OCO4)cc3ccc2c2ccc3c(OCO3)c2c1	C20H14ClNO4	367.78	Plant	Alkaloids	Sanguinarine chloride, a benzophenanthridine alkaloid, stimulates apoptosis by activating the production of reactive oxygen species (ROS).
53	T0130	Physostigmine Salicylate	57-64-7	3 μl, 10 mMol/l	OC(=O)c1ccccc1O.CNC(=O)Oc1cc2c(cc1)N(C)[C@H]1N(C)CC[C@@]21C	C22H27N3O5	413.48	Plant	Alkaloids	Physostigmine, a parasympathomimetic alkaloid, is a reversible cholinesterase inhibitor. It extracts from the Calabar bean.
54	T0148	Calcium folinate	1492-18-8	3 μl, 10 mMol/l	C1C(N(c2c(N1)[nH]c(nc2=O)N)C=O)CNc1ccc(cc1)C(=O)N[C@@H](CCC(=O)[O-])C(=O)[O-].[Ca+2]	C20H21CaN7O7	511.51	Plant	Others	Leucovorin calcium is the active metabolite of folic acid. Leucovorin is used principally as an antidote to folic acid antagonists.
55	T0186	Docetaxel trihydrate	148408-66-6	3 μl, 10 mMol/l	CC1=C2[C@H](C(=O)[C@@]3([C@H](C[C@@H]4[C@]([C@H]3[C@@H]([C@@](C2(C)C)(C[C@@H]1OC(=O)[C@@H]([C@H](C5=CC=CC=C5)NC(=O)OC(C)(C)C)O)O)OC(=O)C6=CC=CC=C6)(CO4)OC(=O)C)O)C)O.O.O.O	C43H59NO17	861.95	Plant	Alkaloids	Docetaxel is an antineoplastic agent that has a unique mechanism of action as an inhibitor of cellular mitosis and that currently plays a central role in the therapy of many solid tumor including breast and lung cancer. Therapy with docetaxel has been associated with a low rate of serum enzyme elevations and rarely to instances of acute hepatic necrosis generally due to severe hypersensitivity re…
56	T0200	Thioctic acid	1077-28-7	3 μl, 10 mMol/l	OC(=O)CCCCC1CCSS1	C8H14O2S2	206.33	Plant	Others	Thioctic acid is an octanoic acid bridged with two sulfurs so that it is sometimes also called a pentanoic acid in some naming schemes. It is biosynthesized by cleavage of LINOLEIC ACID and is a coenzyme of oxoglutarate dehydrogenase (KETOGLUTARATE DEHYDROGENASE COMPLEX). It is used in DIETARY SUPPLEMENTS.
57	T0228	Methyl hesperidin	11013-97-1	3 μl, 10 mMol/l	C[C@H]1[C@@H]([C@H]([C@H]([C@@H](O1)OC[C@@H]1[C@H]([C@@H]([C@H]([C@@H](O1)Oc1cc(c2C(=O)C[C@H](Oc2c1)c1cc(c(cc1)OC)OC)O)O)O)O)O)O)O	C29H36O15	624.59	Plant	Flavonoids	Methyl Hesperidin, a flavanone glycoside (flavonoid) (C28H34O15), is abundant in citrus fruits. Its aglycone form is called hesperetin.
58	T0243	Vanitiolide	17692-71-6	3 μl, 10 mMol/l	COc1cc(ccc1O)C(=S)N1CCOCC1	C12H15NO3S	253.32	Plant	Others	A choleretic.
59	T0247	Acarbose	56180-94-0	3 μl, 10 mMol/l	O([C@H]1[C@H](O)[C@@H](O)[C@H](O[C@@H]1CO)O[C@H]1[C@H](O)[C@@H](O)C(O[C@@H]1CO)O)[C@H]1O[C@@H]([C@@H](N[C@@H]2[C@H](O)[C@@H](O)[C@H](O)C(=C2)CO)[C@H](O)[C@H]1O)C	C25H43NO18	645.6	Microorganism	saccharides	Acarbose is an inhibitor of α-Glucosidases with antihyperglycemic activity.
60	T0266	Quinidine hydrochloride	6151-40-2	3 μl, 10 mMol/l	O.Cl.COc1cc2c(ccnc2cc1)[C@H](O)[C@H]1C[C@@H]2CCN1C[C@@H]2C=C	C20H27ClN2O3	378.89	Plant	Alkaloids	Quinidine is an optical isomer of quinine, extracted from the bark of the Cinchona tree and similar plant species. It prolongs cellular action potential and decreases automaticity. This alkaloid dampens the excitability of cardiac and skeletal muscles by blocking sodium and potassium currents across cellular membranes. Quinidine also blocks muscarinic and alpha-adrenergic neurotransmission.
61	T0269	Dichlorisone Acetate	79-61-8	3 μl, 10 mMol/l	CC(=O)OCC(=O)[C@]1(CC[C@@H]2[C@@]1(C[C@@H]([C@]1([C@H]2CCC2=CC(=O)C=C[C@]12C)Cl)Cl)C)O	C23H28Cl2O5	455.4	Animal	Terpenoids	Dichlorisone Acetate is a synthetic glucocorticoid corticosteroid with anti-inflammatory activity.
62	T0278	Escin	6805-41-0	3 μl, 10 mMol/l	C\C=C(\C)C(=O)O[C@H]1[C@H](OC(C)=O)[C@]2(CO)[C@@H](O)C[C@]3(C)C(=CCC4[C@@]5(C)CC[C@H](O[C@@H]6O[C@@H]([C@@H](O[C@H]7O[C@@H](CO)[C@H](O)[C@@H](O)[C@@H]7O)[C@H](O)[C@H]6O[C@@H]6O[C@H](CO)[C@@H](O)[C@H](O)[C@H]6O)C(O)=O)[C@](C)(CO)C5CC[C@@]34C)C2CC1(C)C	C55H86O24	1131.28	Plant	Glycosides	Escin is biosynthesized from protoaescigenin and barringtogenol, occurring in the seeds of Aesculus.
63	T0295	Digitoxin	71-63-6	3 μl, 10 mMol/l	C[C@@H]1[C@H]([C@H](C[C@@H](O1)O[C@@H]2[C@H](O[C@H](C[C@@H]2O)O[C@@H]3[C@H](O[C@H](C[C@@H]3O)O[C@H]4CC[C@]5([C@@H](C4)CC[C@@H]6[C@@H]5CC[C@]7([C@@]6(CC[C@@H]7C8=CC(=O)OC8)O)C)C)C)C)O)O	C41H64O13	764.94	Plant	Glycosides	Digitoxin is an effective Na+/K+-ATPase inhibitor (EC50 value: 0.78 μM).
64	T0320	Colchicine	64-86-8	3 μl, 10 mMol/l	COc1c(OC)c(OC)c2c(CCC(NC(=O)C)c3cc(=O)c(OC)ccc23)c1	C22H25NO6	399.44	Plant	Alkaloids	Colchicine is a tubulin inhibitor, it blocks polymerization of microtubules by binding to tubulin.
65	T0834	Ethylparaben	120-47-8	3 μl, 10 mMol/l	CCOC(=O)c1ccc(O)cc1	C9H10O3	166.17	Animal	Phenols	Ethylparaben is a Standardized Chemical Allergen. The physiologic effect of ethylparaben is by means of Increased Histamine Release, and Cell-mediated Immunity.
66	T0326	DL-Glutamine	6899-04-3	3 μl, 10 mMol/l	NC(CCC(=O)N)C(=O)O	C5H10N2O3	146.15	Animal	Others	DL-Glutamine, a non-essential amino acid, exists abundantly throughout the body and is participated in many metabolic processes. It is synthesized from glutamic acid and ammonia, and is the main carrier of nitrogen in the body and is an important energy source for many cells.
67	T4788	L-Norvaline	6600-40-4	3 μl, 10 mMol/l	CCC[C@H](N)C(O)=O	C5H11NO2	117.15	Animal	Others	Norvaline is a non-proteinogenic branched-chain amino acid. It has previously been reported to be a natural component of an antifungal peptide of Bacillus subtilis. Norvaline and other modified branched chain amino acids have received attention in recent studies, as they appear to be incorporated in some recombinant proteins found in E. coli. Norvaline is an amino acid with the chemical formula C…
68	T0332	D-Sorbitol	50-70-4	3 μl, 10 mMol/l	OC[C@H](O)[C@@H](O)[C@H](O)[C@H](O)CO	C6H14O6	182.17	Plant;Animal	Alcohol	Sorbitol is a polyhydric alcohol with about half the sweetness of sucrose. Sorbitol occurs naturally and is also produced synthetically from glucose. It was formerly used as a diuretic and may still be used as a laxative and in irrigating solutions for some surgical procedures. It is also used in many manufacturing processes, as a pharmaceutical aid, and in several research applications.
69	T1020	Doxorubicin hydrochloride	25316-40-9	3 μl, 10 mMol/l	[C@@H]1(C[C@@H]([C@@H]([C@@H](O1)C)O)N)O[C@H]1C[C@@](Cc2c(c3C(=O)c4cccc(c4C(=O)c3c(c12)O)OC)O)(C(=O)CO)O.Cl	C27H29NO11·HCl	579.99	Microorganism	Others	Doxorubicin intercalates between base pairs in the DNA helix, thereby preventing DNA replication and ultimately inhibiting protein synthesis. Additionally, doxorubicin inhibits topoisomerase II which results in an increased and stabilized cleavable enzyme-DNA linked complex during DNA replication and subsequently prevents the ligation of the nucleotide strand after double-strand breakage. Doxorub…
70	T0469	Octopamine hydrochloride	770-05-8	3 μl, 10 mMol/l	Cl.NCC(O)c1ccc(O)cc1	C8H12CINO2	189.64	Animal	Others	Octopamine (OA) is a biogenic monoamine structurally associated with noradrenaline. It can serve as a neurohormone, a neurotransmitter, and a neuromodulator in invertebrates.
71	T0473	Arbutin	497-76-7	3 μl, 10 mMol/l	OC[C@H]1O[C@@H](Oc2ccc(O)cc2)[C@H](O)[C@@H](O)[C@@H]1O	C12H16O7	272.25	Plant	Glycosides	Arbutin(β-Arbutin) is a glycosylated hydroquinone extracted from the bearberry plant in the genus Arctostaphylos and can inhibit tyrosinase and thus prevent the formation of melanin.
72	T0486	Irinotecan hydrochloride trihydrate	136572-09-3	3 μl, 10 mMol/l	O=C(N1CCC(N2CCCCC2)CC1)Oc1ccc2nc3c(Cn4c(=O)c5COC(=O)[C@](c5cc34)(O)CC)c(CC)c2c1.O.Cl.O.O	C33H45ClN4O9	677.18	Plant	Alkaloids	Irinotecan HCl-trihydrate keeps DNA from unwinding by inhibiting topoisomerase 1.
73	T1086	Vitamin D2	50-14-6	3 μl, 10 mMol/l	[C@@]12([C@H](/C(=C/C=C/3\C(=C)CC[C@@H](C3)O)/CCC2)CC[C@@H]1[C@@H](/C=C/[C@@H](C(C)C)C)C)C	C28H44O	396.65	Animal	Miscellaneous	Ergocalciferol (Vitamin D2) is a derivative of ergosterol formed by ultraviolet rays breaking of the C9-C10 bond with a strong inhibitory effect against bladder tumor promotion by sodium saccharin, and it induces cell differentiation in leukemia cells. Vitamin D2 is an inhibitor of DNA Polymerase.
74	T0478	Progesterone	57-83-0	3 μl, 10 mMol/l	CC(=O)[C@H]1CC[C@@H]2[C@@]1(CC[C@H]1[C@H]2CCC2=CC(=O)CC[C@]12C)C	C21H30O2	314.47	Animal	Steroids	Progesterone is the major progestational steroid that is secreted primarily by the CORPUS LUTEUM and the PLACENTA. Progesterone acts on the UTERUS, the MAMMARY GLANDS and the BRAIN. It is required in EMBRYO IMPLANTATION; PREGNANCY maintenance, and the development of mammary tissue for MILK production.
75	T0479	Cytisine	485-35-8	3 μl, 10 mMol/l	O=c1cccc2[C@H]3CNC[C@H](C3)Cn12	C11H14N2O	190.25	Plant	Alkaloids	Cytisine, an alkaloid, is found naturally in several plants.
76	T0480	Doxofylline	69975-86-6	3 μl, 10 mMol/l	Cn1c2c(n(CC3OCCO3)cn2)c(=O)n(C)c1=O	C11H14N4O4	266.26	Plant	Alkaloids	Doxofylline is a methylxanthine derivative with the presence of a dioxolane group in position 7. As a drug used in the treatment of asthma, doxofylline has shown similar efficacy to theophylline but with significantly fewer side effects in animal and human studies.
77	T0493	Tyrosine	60-18-4	3 μl, 10 mMol/l	C(=O)([C@@H](N)Cc1ccc(O)cc1)O	C9H11NO3	181.19	Animal	Amino acids	L-tyrosine is a naturally occurring tyrosine and is synthesized in vivo from L-phenylalanine, considered a non-essential amino acid. L-Tyrosine is the levorotatory isomer of the aromatic amino acid tyrosine.
78	T0496	Creatinine	60-27-5	3 μl, 10 mMol/l	CN1CC(=O)N=C1N	C4H7N3O	113.12	Animal	Others	Creatinine is the breakdown product of creatine, a constituent of muscle tissue, that is excreted by the kidney and whose serum level is used to evaluate kidney function.
